# Supplementary material
Source: PubMed Central journal article supplement (PMC4490592)
Supplement: Supp_Fig2.pdf [file Supp_Fig2.pdf]

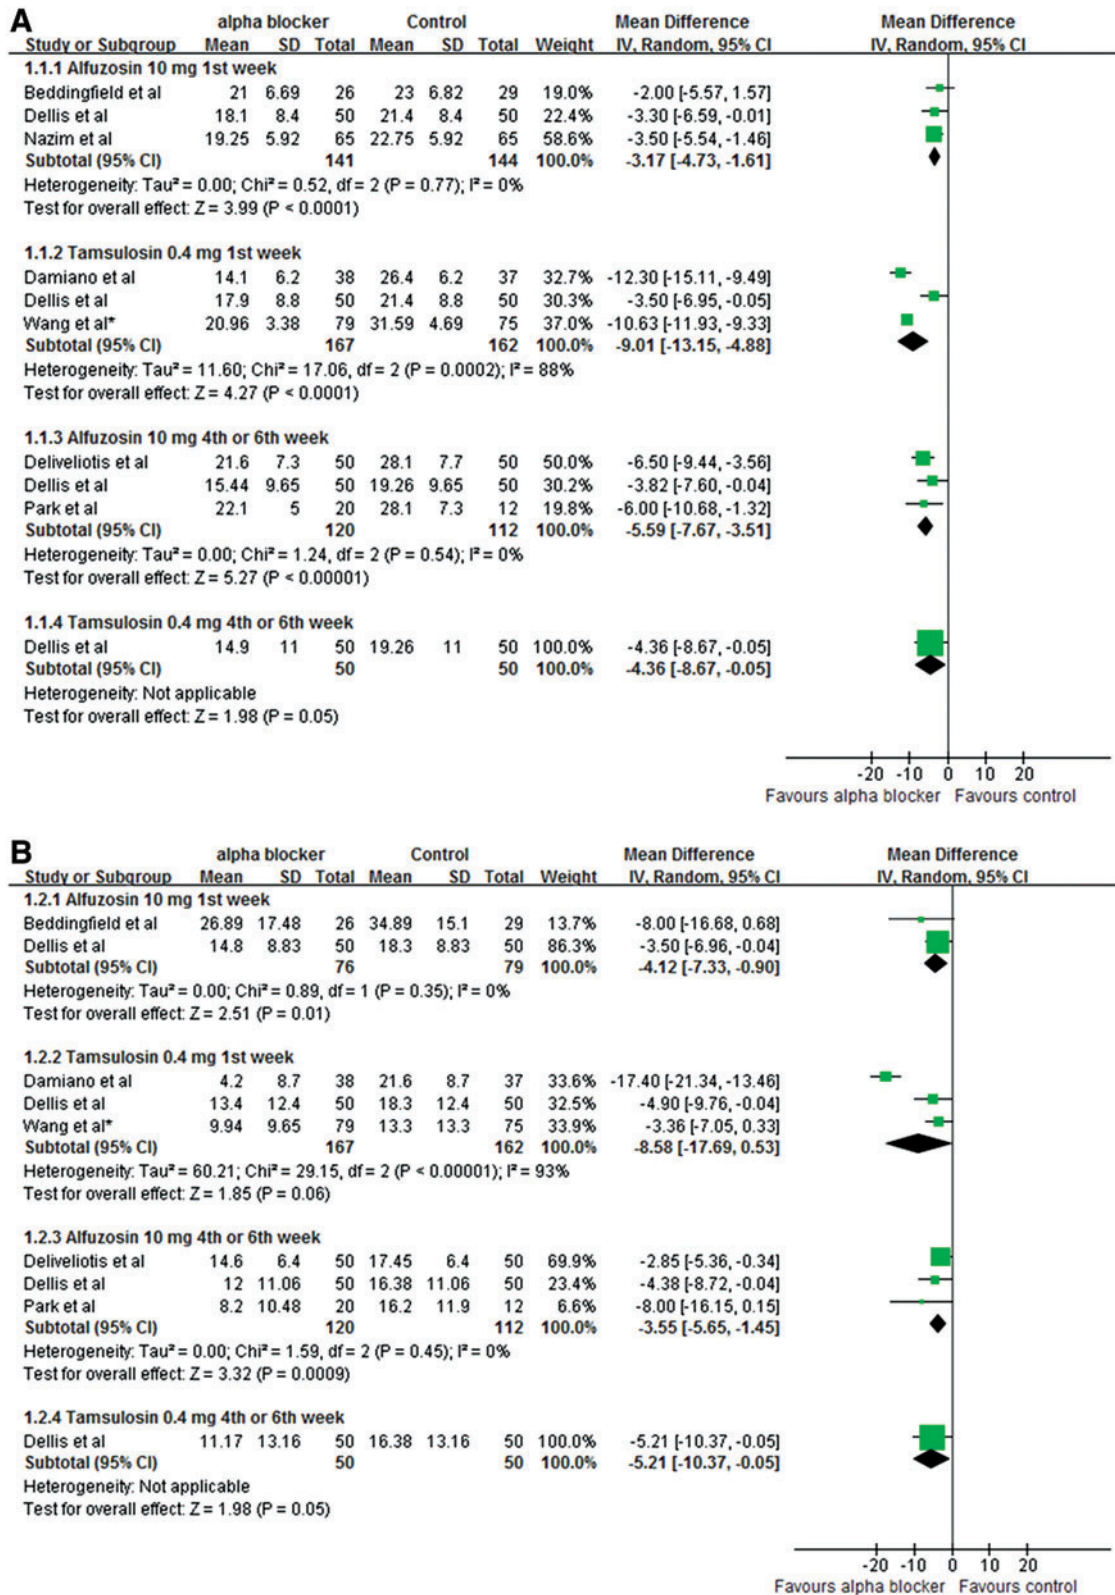

**SUPPLEMENTARY FIG. S2.** Urinary symptoms (A) and pain (B) index score of the Ureteral Stent Symptom Questionnaire in subgroup analyses. CI=confidence interval; SD=standard deviation.
