# Supplementary material
Source: PubMed Central journal article supplement (PMC4490592)

## Supplementary Data

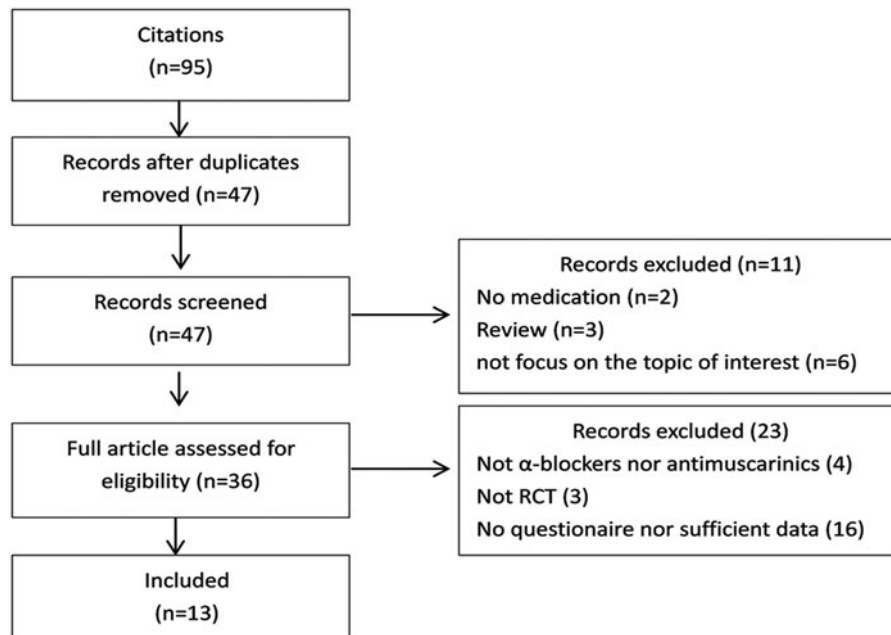

**SUPPLEMENTARY FIG. S1.** Screening process.

Supplement: Supp_Fig1.pdf [file Supp_Fig1.pdf]
